# Supplementary material
Source: PubMed Central journal article supplement (PMC3926887)
Supplement: cbt-14-907-s01.pdf [file cbt-14-907-s01.pdf]

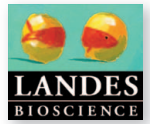

## **Supplemental Material to:**

**Anna Kovalchuk, Felix Aladedunye, Rocio Rodriguez-Juarez, Dongping Li, James Thomas, Olga Kovalchuk, and Roman Przybylski**

**Novel antioxidants are not toxic to normal tissues but effectively kill cancer cells**

**Cancer Biology & Therapy 2012; 14(10)**

**<http://dx.doi.org/10.4161/cbt.25935>**

**<http://www.landesbioscience.com/journals/cbt/article/25935/>**

**Table S1. Genes differentially expressed in EpiOral tissues treated with 1b antioxidant compound (1.5 fold cut-off). Genes differentially regulated at more than 2 fold cut-off are in red.**

| <b><i>SYMBOL</i></b> | <b><i>Fold change (Log2)</i></b> | <b><i>Gene Name</i></b>                               |
|----------------------|----------------------------------|-------------------------------------------------------|
| ARRDC4               | -1.12                            | arrestin domain containing 4                          |
| JUN                  | -0.82                            | Jun oncogene                                          |
| SOX2                 | -0.80                            | SRY (sex determining region Y)-box 2                  |
| HBEGF                | -0.74                            | heparin-binding EGF-like growth factor                |
| ADRB2                | -0.71                            | adrenergic, beta-2-, receptor, surface                |
| SERTAD1              | -0.69                            | SERTA domain containing 1                             |
| SOX9                 | -0.59                            | SRY (sex determining region Y)-box 9                  |
| SRXN1                | -0.58                            | sulfiredoxin 1 homolog                                |
| ECHDC2               | 0.58                             | enoyl Coenzyme A hydratase domain containing 2        |
| LOC158160            | 0.72                             | hydroxysteroid (17-beta) dehydrogenase 7 pseudogene 2 |
| LOC123688            | 0.82                             | aminoglycoside phosphotransferase domain containing 1 |
| DTWD2                | 0.85                             | similar to DTW domain containing 2                    |

**Table S2. Genes differentially expressed in EpiOral tissues treated with 2a antioxidant compound (1.5 fold cut-off). Genes differentially regulated at more than 2 fold cut-off are in red.**

| <b>SYMBOL</b> | <b>Fold change (log 2)</b> | <b>Gene name</b>                                                    |
|---------------|----------------------------|---------------------------------------------------------------------|
| ADM           | 1.09                       | adrenomedullin                                                      |
| ADRB2         | -0.86                      | adrenergic, beta-2-, receptor, surface                              |
| ANKRD37       | 0.91                       | ankyrin repeat domain 37                                            |
| DDIT4         | 1.02                       | DNA-damage-inducible transcript 4                                   |
| EGR1          | 0.71                       | early growth response 1                                             |
|               |                            | H3 histone, family 3B (H3.3B); H3 histone, family 3A pseudogene;    |
|               |                            | H3 histone, family 3A; similar to H3 histone, family 3B; similar to |
| LOC440926     | -0.59                      | histone H3.3B                                                       |
| MIR1974       | 1.44                       | microRNA 1974                                                       |
| OVOL2         | -0.64                      | ovo-like 2 (Drosophila)                                             |
| PFKFB3        | 0.83                       | 6-phosphofructo-2-kinase/fructose-2,6-biphosphatase 3               |
| PPIB          | -0.65                      | peptidylprolyl isomerase B (cyclophilin B)                          |
|               |                            | RNA, U4 small nuclear 2; RNA, U4 small nuclear 1; RNA, U4 small     |
| RNU4-2        | 0.63                       | nuclear 1B                                                          |
| SGK1          | -0.58                      | serum/glucocorticoid regulated kinase 1                             |
| SNORD56       | 0.66                       | small nucleolar RNA, C/D box 56; small nucleolar RNA, C/D box 56B   |
| SOX2          | -0.69                      | SRY (sex determining region Y)-box 2                                |
|               |                            | small proline-rich protein 2C (pseudogene); small proline-rich      |
| SPRR2C        | -0.62                      | protein 2G                                                          |

**Table S3. Genes differentially expressed in EpiOral tissues treated with 2b antioxidant compound (1.5 fold cut-off). No genes were differentially regulated at more than 2 fold cut-off.**

| <b><i>SYMBOL</i></b> | <b><i>Fold (log 2)</i></b> | <b><i>Gene name</i></b>                                   |
|----------------------|----------------------------|-----------------------------------------------------------|
| ADRB2                | -0.75                      | adrenergic, beta-2-, receptor, surface                    |
| AGAP8                | 0.57                       | ArfGAP with GTPase domain, ankyrin repeat and PH domain 8 |
| HBEGF                | -0.75                      | heparin-binding EGF-like growth factor                    |
| PHF23                | -0.58                      | PHD finger protein 23                                     |
| PTPLAD2              | 0.57                       | protein tyrosine phosphatase-like A domain containing 2   |

**Table S4. Genes differentially expressed in EpiOral tissues treated with 1a antioxidant compound (1.5 fold cut-off). Genes differentially regulated at more than 2 fold cut-off are in red.**

| <b>SYMBOL</b> | <b>Fold (log 2)</b> | <b>Gene name</b>                                                                                                                          |
|---------------|---------------------|-------------------------------------------------------------------------------------------------------------------------------------------|
| ADM           | 2.82                | adrenomedullin                                                                                                                            |
| ADRB2         | -1.24               | adrenergic, beta-2-, receptor, surface                                                                                                    |
| ANKRD37       | 2.11                | ankyrin repeat domain 37                                                                                                                  |
| ANKRD38       | -0.64               | ankyrin repeat domain 38                                                                                                                  |
| BHLHB2        | 0.63                | Class E basic helix-loop-helix protein 40                                                                                                 |
| C1orf74       | -0.67               | chromosome 1 open reading frame 74                                                                                                        |
| CDK5R1        | -0.64               | cyclin-dependent kinase 5, regulatory subunit 1 (p35)                                                                                     |
| CYP1B1        | -0.65               | cytochrome P450, family 1, subfamily B, polypeptide 1                                                                                     |
| DDIT4         | 1.80                | DNA-damage-inducible transcript 4                                                                                                         |
| DUSP1         | 1.50                | dual specificity phosphatase 1                                                                                                            |
| DUSP6         | -0.94               | dual specificity phosphatase 6                                                                                                            |
| DYRK2         | -0.61               | dual-specificity tyrosine-(Y)-phosphorylation regulated kinase 2                                                                          |
| EGR1          | 1.27                | early growth response 1                                                                                                                   |
| FAM84B        | -0.74               | family with sequence similarity 84, member B                                                                                              |
| FAT2          | -0.68               | FAT tumor suppressor homolog 2 (Drosophila)                                                                                               |
| FERMT1        | -0.71               | fermitin family homolog 1 (Drosophila)                                                                                                    |
| FLRT3         | -0.65               | fibronectin leucine rich transmembrane protein 3                                                                                          |
| FTSJD1        | -0.61               | FtsJ methyltransferase domain containing 1                                                                                                |
| GFOD1         | -0.62               | glucose-fructose oxidoreductase domain containing 1                                                                                       |
| HBEGF         | -0.77               | heparin-binding EGF-like growth factor                                                                                                    |
| HES1          | 0.91                | hairy and enhancer of split 1, (Drosophila)                                                                                               |
| HES5          | -1.12               | hairy and enhancer of split 5 (Drosophila)                                                                                                |
| HSZFP36       | -0.60               | small RNA                                                                                                                                 |
| IER3          | 0.95                | immediate early response 3                                                                                                                |
| IER5          | -0.93               | immediate early response 5                                                                                                                |
| IRX3          | -0.81               | iroquois homeobox 3                                                                                                                       |
| IRX5          | -0.91               | iroquois homeobox 5                                                                                                                       |
| KIAA0182      | -0.61               | KIAA0182                                                                                                                                  |
| MEX3C         | -0.61               | mex-3 homolog C (C. elegans)                                                                                                              |
| MMP10         | -0.63               | matrix metalloproteinase 10 (stromelysin 2)                                                                                               |
| MYC           | -0.85               | v-myc myelocytomatosis viral oncogene homolog (avian)<br>pleiomorphic adenoma gene-like 2; similar to pleiomorphic<br>adenoma gene-like 2 |
| PLAGL2        | -0.58               | adenoma gene-like 2                                                                                                                       |
| PPP1R3C       | 1.45                | protein phosphatase 1, regulatory (inhibitor) subunit 3C                                                                                  |
| RND3          | -0.87               | Rho family GTPase 3                                                                                                                       |
| SERPINE1      | -0.80               | serpin peptidase inhibitor, clade E (nexin, plasminogen activator<br>inhibitor type 1), member 1                                          |
| SFRS6         | -0.60               | splicing factor, arginine/serine-rich 6; similar to arginine/serine-rich<br>splicing factor 6                                             |
| SFRS7         | -0.60               | splicing factor, arginine/serine-rich 7, 35kDa                                                                                            |
| SLC16A9       | -0.61               | solute carrier family 16, member 9 (monocarboxylic acid transporter<br>9)                                                                 |
| SNORA12       | -1.67               | small nucleolar RNA, H/ACA box 12                                                                                                         |
| SOX2          | -0.78               | SRY (sex determining region Y)-box 2                                                                                                      |
| SOX21         | -0.97               | SRY (sex determining region Y)-box 21                                                                                                     |
| SOX9          | -0.68               | SRY (sex determining region Y)-box 9                                                                                                      |

|          |       |                                                   |
|----------|-------|---------------------------------------------------|
| SPRY2    | -0.89 | sprouty homolog 2 (Drosophila)                    |
| STK40    | -0.71 | serine/threonine kinase 40                        |
| TP53INP1 | -0.66 | tumor protein p53 inducible nuclear protein 1     |
| TRIB1    | -0.95 | tribbles homolog 1 (Drosophila)                   |
| TSC22D2  | -0.63 | TSC22 domain family, member 2                     |
| ZBED5    | -0.97 | zinc finger, BED-type containing 5                |
| ZC3H12C  | -0.78 | zinc finger CCCH-type containing 12C              |
| ZFP36    | 1.11  | zinc finger protein 36, C3H type, homolog (mouse) |
| ZNF217   | -0.68 | zinc finger protein 217                           |
| ZNF281   | -0.63 | zinc finger protein 281                           |

**Table S5. Genes differentially expressed in EpiGingival tissues treated with 1b antioxidant compound (1.5 fold cut-off). Genes differentially regulated at more than 2 fold cut-off are in red.**

| <i>SYMBOL</i>       | <i>Fold (log 2)</i> | <i>Gene name</i>                                                                                                              |
|---------------------|---------------------|-------------------------------------------------------------------------------------------------------------------------------|
| ABCA12              | -0.66               | ATP-binding cassette, sub-family A (ABC1), member 12                                                                          |
| ANXA9               | -0.77               | annexin A9                                                                                                                    |
| ARG1                | -0.78               | arginase, liver                                                                                                               |
| ARID5B              | -0.65               | AT rich interactive domain 5B (MRF1-like)                                                                                     |
| ASPRV1              | -0.65               | aspartic peptidase, retroviral-like 1                                                                                         |
| ATP10B              | -0.90               | ATPase, class V, type 10B                                                                                                     |
| C10orf116           | 0.62                | chromosome 10 open reading frame 116                                                                                          |
| C5orf46             | -0.62               | chromosome 5 open reading frame 46                                                                                            |
| CFLAR               | -0.75               | CASP8 and FADD-like apoptosis regulator                                                                                       |
| CLDN17              | -0.64               | claudin 17                                                                                                                    |
| CYP2C18             | -0.63               | cytochrome P450, family 2, subfamily C, polypeptide 18                                                                        |
| CYP4B1              | -0.61               | cytochrome P450, family 4, subfamily B, polypeptide 1                                                                         |
| CYP4F22             | -0.63               | cytochrome P450, family 4, subfamily F, polypeptide 22                                                                        |
| DSC1                | -0.79               | desmocollin 1                                                                                                                 |
| DSG1                | -0.66               | desmoglein 1                                                                                                                  |
| EDN1                | 0.92                | endothelin 1                                                                                                                  |
| EHF                 | -0.67               | ets homologous factor                                                                                                         |
| ELOVL4              | -0.58               | elongation of very long chain fatty acids (FEN1/Elo2, SUR4/Elo3, yeast)-like 4                                                |
| FETUB               | -0.72               | fetuin B                                                                                                                      |
| FLG                 | -0.71               | filaggrin                                                                                                                     |
| FLG2                | -0.89               | filaggrin family member 2                                                                                                     |
| FLJ22536            | -0.61               | hypothetical locus LOC401237                                                                                                  |
| FLJ22662            | -0.81               | feline leukemia virus subgroup C cellular receptor family, member 2                                                           |
| FLVCR2              | -0.60               |                                                                                                                               |
| GLRX                | -0.58               | glutaredoxin (thioltransferase)                                                                                               |
| HAL                 | -0.70               | histidine ammonia-lyase                                                                                                       |
| HRNR                | -0.80               | hornerin                                                                                                                      |
| HSD17B4             | -0.58               | hydroxysteroid (17-beta) dehydrogenase 4                                                                                      |
| HSDL2               | -0.69               | hydroxysteroid dehydrogenase like 2                                                                                           |
| IQCG                | -0.63               | IQ motif containing G                                                                                                         |
| KLK13               | -0.75               | kallikrein-related peptidase 13                                                                                               |
| KRT2                | -0.75               | keratin 2                                                                                                                     |
| LASS3               | -0.60               | LAG1 homolog, ceramide synthase 3                                                                                             |
| LCE1C               | -0.83               | late cornified envelope 1C                                                                                                    |
| LOC100129144        | -0.61               | similar to hCG2042189                                                                                                         |
| <b>LOC100130246</b> | <b>-1.35</b>        |                                                                                                                               |
| <b>LOC730833</b>    | <b>-1.14</b>        |                                                                                                                               |
| LOC731486           | -0.66               |                                                                                                                               |
| LPHN2               | -0.77               | latrophilin 2                                                                                                                 |
| LY6G6C              | -0.59               | lymphocyte antigen 6 complex, locus G6C<br>similar to cofactor required for Sp1 transcriptional activation, subunit 8, 34kDa; |
| <b>MED27</b>        | <b>-1.12</b>        | <b>mediator complex subunit 27; CRSP8 pseudogene</b>                                                                          |
| MYO1G               | -0.66               | myosin IG                                                                                                                     |

|           |       |                                                                 |
|-----------|-------|-----------------------------------------------------------------|
| PLA2G4D   | -0.78 | phospholipase A2, group IVD (cytosolic)                         |
| RNASE7    | -0.58 | ribonuclease, RNase A family, 7                                 |
| RPTN      | -0.92 | repetin                                                         |
| SASH1     | -0.69 | SAM and SH3 domain containing 1                                 |
| SH3BGRL2  | -0.81 | SH3 domain binding glutamic acid-rich protein like 2            |
| SH3GL3    | -0.68 | SH3-domain GRB2-like 3                                          |
| SPINK5    | -0.66 | serine peptidase inhibitor, Kazal type 5                        |
| SRPK1     | -0.61 | SFRS protein kinase 1                                           |
| TAOK1     | -0.68 | TAO kinase 1                                                    |
| TCN1      | -0.64 | transcobalamin I (vitamin B12 binding protein, R binder family) |
| TGM5      | -0.68 | transglutaminase 5                                              |
| TMPRSS11B | -0.63 | transmembrane protease, serine 11B                              |
| TP53INP2  | -0.77 | tumor protein p53 inducible nuclear protein 2                   |
| ZNF91     | -0.78 | zinc finger protein 91                                          |



**Table S6. Genes differentially expressed in EpiGingival tissues treated with 2a antioxidant compound (1.5 fold cut-off). Genes differentially regulated at more than 2 fold cut-off are in red.**

| <i>SYMBOL</i> | <i>Fold (log 2)</i> | <i>Gene name</i>                                                               |
|---------------|---------------------|--------------------------------------------------------------------------------|
| ALDH1A3       | 0.66                | aldehyde dehydrogenase 1 family, member A3                                     |
| ALPP          | -0.87               | alkaline phosphatase, placental (Regan isozyme)                                |
| ALS2CR14      | -0.63               |                                                                                |
| ANKRD30B      | -0.62               | ankyrin repeat domain 30B                                                      |
| ARG1          | -0.59               | arginase, liver                                                                |
| ARL16         | -0.63               | ADP-ribosylation factor-like 16                                                |
| BLZF1         | -0.69               | basic leucine zipper nuclear factor 1                                          |
| BMS1P5        | -0.66               | BMS1 pseudogene 5                                                              |
| C13orf15      | 0.64                | chromosome 13 open reading frame 15                                            |
| C14orf153     | -0.72               | chromosome 14 open reading frame 153                                           |
| C14orf85      | -0.65               |                                                                                |
| C15orf52      | -0.59               | chromosome 15 open reading frame 52                                            |
| C15orf63      | -0.84               | chromosome 15 open reading frame 63; small EDRK-rich factor 2                  |
| C2orf69       | -0.84               | chromosome 2 open reading frame 69                                             |
| C9orf130      | -0.59               | chromosome 9 open reading frame 130                                            |
| C9orf80       | -0.76               | chromosome 9 open reading frame 80                                             |
| CATSPER2      | -0.66               | cation channel, sperm associated 2                                             |
| CCBE1         | -0.76               | collagen and calcium binding EGF domains 1                                     |
| CCL20         | 0.63                | chemokine (C-C motif) ligand 20                                                |
| CD83          | 0.68                | CD83 molecule                                                                  |
| CEP27         | -0.64               |                                                                                |
| CFLAR         | -0.67               | CASP8 and FADD-like apoptosis regulator                                        |
| CGN           | -0.66               | cingulin                                                                       |
| CRCP          | -0.66               | CGRP receptor component                                                        |
| CXCL1         | 0.58                | chemokine (C-X-C motif) ligand 1 (melanoma growth stimulating activity, alpha) |
| DDX51         | -0.75               | DEAD (Asp-Glu-Ala-Asp) box polypeptide 51                                      |
| DKFZp434K191  | -0.77               |                                                                                |
| DTWD2         | -0.81               | similar to DTW domain containing 2; DTW domain containing 2                    |
| DUSP19        | -0.71               | dual specificity phosphatase 19                                                |
| EDN1          | 0.70                | endothelin 1                                                                   |
| EIF2AK4       | -0.77               | eukaryotic translation initiation factor 2 alpha kinase 4                      |
| EVI5          | -0.67               | ecotropic viral integration site 5                                             |
| FAM175A       | -0.85               | family with sequence similarity 175, member A                                  |
| FAM3D         | -0.74               | family with sequence similarity 3, member D                                    |
| FKBP14        | -0.73               | FK506 binding protein 14, 22 kDa                                               |
| FLG           | -0.66               | filaggrin                                                                      |
| FLJ25363      | -0.89               | similar to hypothetical protein FLJ25976                                       |
| FLJ35390      | -0.88               | hypothetical LOC255031                                                         |
| FLJ44124      | -0.72               | hypothetical LOC641737                                                         |
| FLJ46309      | -0.65               |                                                                                |

|              |       |                                                                                                                                              |
|--------------|-------|----------------------------------------------------------------------------------------------------------------------------------------------|
| GFOD1        | -0.59 | glucose-fructose oxidoreductase domain containing 1                                                                                          |
| HIATL2       | -1.05 | hippocampus abundant transcript-like 2                                                                                                       |
| HNRNPU       | -0.62 | heterogeneous nuclear ribonucleoprotein U (scaffold attachment factor A)                                                                     |
| HSD17B7      | -0.84 | hydroxysteroid (17-beta) dehydrogenase 7                                                                                                     |
| LOC100128062 | -0.61 |                                                                                                                                              |
| LOC100128084 | -0.82 | hypothetical LOC100128084                                                                                                                    |
| LOC100128288 | -0.62 | hypothetical protein LOC100128288                                                                                                            |
| LOC100128505 | -0.66 | similar to hCG2021201                                                                                                                        |
| LOC100128510 | -0.61 | hypothetical protein LOC100128510                                                                                                            |
| LOC100129211 | -0.73 |                                                                                                                                              |
| LOC100129502 | -0.83 | hypothetical protein LOC100129502                                                                                                            |
| LOC100129905 | -0.66 |                                                                                                                                              |
| LOC100130053 | -1.12 |                                                                                                                                              |
| LOC100130168 | -0.70 | hypothetical protein LOC100130168                                                                                                            |
| LOC100130276 | -0.66 | hypothetical protein LOC100130276                                                                                                            |
| LOC100130598 | -0.63 |                                                                                                                                              |
| LOC100131718 | -1.14 |                                                                                                                                              |
| LOC100131989 | -0.97 |                                                                                                                                              |
| LOC100132391 | -0.67 |                                                                                                                                              |
|              |       | hypothetical LOC100132581; similar to speedy homolog A; WBSER19-like protein 5-like; speedy homolog E8 ( <i>Xenopus laevis</i> ), pseudogene |
| LOC100132585 | -0.92 |                                                                                                                                              |
| LOC100132727 | -0.82 |                                                                                                                                              |
| LOC100133019 | -0.62 | similar to hCG1983765                                                                                                                        |
| LOC100133298 | -0.77 |                                                                                                                                              |
| LOC100133516 | -0.96 |                                                                                                                                              |
|              |       | similar to MCT; solute carrier family 16, member 5 (monocarboxylic acid transporter 6)                                                       |
| LOC100133772 | -0.61 |                                                                                                                                              |
| LOC100190938 | -0.64 | hypothetical LOC100190938                                                                                                                    |
| LOC255167    | -0.61 | hypothetical LOC255167                                                                                                                       |
| LOC389765    | -1.02 | similar to KIF27C                                                                                                                            |
| LOC399900    | -0.78 | hypothetical LOC399900                                                                                                                       |
| LOC401098    | -0.90 | hypothetical LOC401098                                                                                                                       |
| LOC401640    | 0.60  |                                                                                                                                              |
| LOC440157    | -0.65 | hypothetical gene supported by BC066547                                                                                                      |
| LOC441087    | -0.78 | hypothetical gene supported by AK125735                                                                                                      |
| LOC644250    | -0.74 |                                                                                                                                              |
| LOC644642    | -0.67 |                                                                                                                                              |
| LOC645452    | -0.86 |                                                                                                                                              |
| LOC646786    | -0.60 |                                                                                                                                              |
| LOC648852    | -0.69 |                                                                                                                                              |
| LOC648921    | -0.90 |                                                                                                                                              |
| LOC653158    | -0.68 |                                                                                                                                              |
| LOC653829    | -0.62 |                                                                                                                                              |
| LOC728105    | -0.72 |                                                                                                                                              |
| LOC728205    | -0.59 |                                                                                                                                              |

|                 |              |                                                                                                                                                                       |
|-----------------|--------------|-----------------------------------------------------------------------------------------------------------------------------------------------------------------------|
| LOC728620       | -0.67        |                                                                                                                                                                       |
| LOC728809       | -0.73        | hypothetical LOC728809                                                                                                                                                |
| LOC729120       | -0.75        |                                                                                                                                                                       |
| LOC729603       | -0.63        | calcium binding protein P22 pseudogene                                                                                                                                |
| LOC730060       | -0.66        | hypothetical LOC730060                                                                                                                                                |
| LOC730313       | -0.79        |                                                                                                                                                                       |
| LPHN2           | -0.61        | latrophilin 2                                                                                                                                                         |
| LRAP            | -0.70        |                                                                                                                                                                       |
| <b>LRRC37B2</b> | <b>-1.05</b> | leucine rich repeat containing 37, member B2                                                                                                                          |
| MAGT1           | -0.87        | magnesium transporter 1                                                                                                                                               |
| MBD4            | -0.83        | methyl-CpG binding domain protein 4                                                                                                                                   |
| MCART1          | -0.92        | mitochondrial carrier triple repeat 1                                                                                                                                 |
| MFSD11          | -0.61        | major facilitator superfamily domain containing 11                                                                                                                    |
| MMP3            | 0.81         | matrix metalloproteinase 3 (stromelysin 1, progelatinase)<br>metallothionein 1L (gene/pseudogene); metallothionein 1E;                                                |
| MT1E            | 0.59         | metallothionein 1 pseudogene 3; metallothionein 1J (pseudogene)                                                                                                       |
| NUBPL           | -0.97        | nucleotide binding protein-like                                                                                                                                       |
| PIP5K2B         | -0.75        |                                                                                                                                                                       |
| PLA2G2D         | -0.79        | phospholipase A2, group IID                                                                                                                                           |
| PLDN            | -0.68        | pallidin homolog (mouse)                                                                                                                                              |
| PNPT1           | -0.71        | polyribonucleotide nucleotidyltransferase 1                                                                                                                           |
| POF1B           | -0.67        | premature ovarian failure, 1B                                                                                                                                         |
| PPP1R3C         | 0.62         | protein phosphatase 1, regulatory (inhibitor) subunit 3C                                                                                                              |
| PRO1853         | -0.72        |                                                                                                                                                                       |
| QRFPR           | -0.78        | pyroglutamylated RFamide peptide receptor                                                                                                                             |
| RAXL1           | -0.81        |                                                                                                                                                                       |
| RGS17           | -0.60        | regulator of G-protein signaling 17                                                                                                                                   |
| RHBDL2          | -0.72        | rhomboid, veinlet-like 2 (Drosophila)<br>ribosomal protein L7-like 1; ribosomal protein L7 pseudogene 14;<br>ribosomal protein L7 pseudogene 21; ribosomal protein L7 |
| RPL7L1          | -0.58        | pseudogene 22; ribosomal protein L7 pseudogene 46                                                                                                                     |
| RPTN            | -0.60        | repetin                                                                                                                                                               |
| SHROOM4         | -0.68        | shroom family member 4<br>Smith-Magenis syndrome chromosome region, candidate 5 (non-<br>protein coding)                                                              |
| SMCR5           | -0.67        |                                                                                                                                                                       |
| SNAPC1          | -0.73        | small nuclear RNA activating complex, polypeptide 1, 43kDa                                                                                                            |
| SPINK5          | -0.59        | serine peptidase inhibitor, Kazal type 5                                                                                                                              |
| TAOK1           | -0.75        | TAO kinase 1                                                                                                                                                          |
| TMEM106A        | -0.92        | hypothetical LOC728772; transmembrane protein 106A                                                                                                                    |
| TMEM17          | -0.82        | transmembrane protein 17                                                                                                                                              |
| TMEM45B         | -0.69        | transmembrane protein 45B                                                                                                                                             |
| TP53INP2        | -0.69        | tumor protein p53 inducible nuclear protein 2                                                                                                                         |
| USP49           | -0.78        | ubiquitin specific peptidase 49                                                                                                                                       |
| XPNPEP3         | -0.62        | X-prolyl aminopeptidase (aminopeptidase P) 3, putative                                                                                                                |
| XRCC2           | -0.60        | X-ray repair complementing defective repair in Chinese hamster cells 2                                                                                                |
| ZNF223          | -0.89        | zinc finger protein 223                                                                                                                                               |
| ZNF394          | -0.64        | zinc finger protein 394                                                                                                                                               |

|        |       |                         |
|--------|-------|-------------------------|
| ZNF486 | -0.59 | zinc finger protein 486 |
| ZNF549 | -0.75 | zinc finger protein 549 |
| ZNF69  | -0.59 | zinc finger protein 69  |
| ZNF738 | -0.96 | zinc finger protein 738 |
| ZNF786 | -0.80 | zinc finger protein 786 |
| ZNF91  | -0.86 | zinc finger protein 91  |

**Table S7. Genes differentially expressed in EpiGingival tissues treated with 2b antioxidant**

| <b><i>SYMBOL</i></b> | <b><i>Fold (log 2)</i></b> | <b><i>Gene name</i></b>                                                                                               |
|----------------------|----------------------------|-----------------------------------------------------------------------------------------------------------------------|
| CCL20                | 0.70                       | chemokine (C-C motif) ligand 20                                                                                       |
| LOC100130246         | -1.09                      |                                                                                                                       |
| LOC646786            | -0.60                      |                                                                                                                       |
| LOC648390            | 0.65                       | similar to cofactor required for Sp1 transcriptional activation, subunit 8, 34kDa; mediator complex subunit 27; CRSP8 |
| MED27                | -0.88                      | pseudogene                                                                                                            |
| TAOK1                | -0.66                      | TAO kinase 1                                                                                                          |
| TMEM45B              | -0.60                      | transmembrane protein 45B                                                                                             |
| ZNF91                | -0.69                      | zinc finger protein 91                                                                                                |

**compound (1.5 fold cut-off). Genes differentially regulated at more than 2 fold cut-off are in red.**

**Table S8. Genes differentially expressed in EpiGingival tissues treated with 1a antioxidant compound (1.5 fold cut-off). Genes differentially regulated at more than 2 fold cut-off are in red.**

| <i>SYMBOL</i>  | <i>Fold (log 2)</i> | <i>Gene name</i>                                         |
|----------------|---------------------|----------------------------------------------------------|
| ADM            | 0.70                | adrenomedullin                                           |
| BTG2           | 0.60                | BTG family, member 2                                     |
| CD83           | 0.74                | FLJ22662                                                 |
| CDC42EP4       | 0.69                | CDC42 effector protein (Rho GTPase binding) 4            |
| DEFB4          | 0.63                |                                                          |
| <b>EDN1</b>    | <b>1.09</b>         | endothelin 1                                             |
| FLJ22662       | -0.72               |                                                          |
| <b>IGFBP3</b>  | 1.01                | insulin-like growth factor binding protein 3             |
| IL1F9          | 0.66                | interleukin 1 family, member 9                           |
| IRF1           | 0.73                | interferon regulatory factor 1                           |
| <b>PPP1R3C</b> | <b>1.38</b>         | protein phosphatase 1, regulatory (inhibitor) subunit 3C |
| RNASE7         | -0.96               | ribonuclease, RNase A family, 7                          |
| S100A7         | -0.79               | S100 calcium binding protein A7                          |
| TNFAIP3        | 0.75                | tumor necrosis factor, alpha-induced protein 3           |
| ZNF395         | 0.65                | zinc finger protein 395                                  |

**Table S9. Genes differentially expressed in MCF-7/DOX cells treated with 1a and 1b antioxidant compounds (1.5 fold cut-off).**

| <u>Dox 106 ONLY</u> |             | <u>Dox 1E ONLY</u> |             | <u>Common in 106 and 1e</u> |            |           |
|---------------------|-------------|--------------------|-------------|-----------------------------|------------|-----------|
| <i>SYMBOL</i>       | <i>Fold</i> | <i>SYMBOL</i>      | <i>Fold</i> |                             | <i>106</i> | <i>1E</i> |
| ADC                 | 0.75771     | CYCSP52            | -0.62166    | EIF4G2                      | -0.81524   | -0.55272  |
| ADRA1B              | 0.853348    | LOC653994          | -0.88086    | HEXB                        | 0.771492   | 0.549012  |
| BAT2D1              | 0.446098    | MRPS30             | -0.54535    | NT5DC2                      | 1.255453   | 0.794597  |
| C11orf10            | 0.666188    | NDUFA3             | 0.559712    |                             |            |           |
| C16orf68            | -0.73791    | PPP3R1             | -0.63045    |                             |            |           |
| CALM3               | 0.903387    | PSMD14             | -0.83059    |                             |            |           |
| CAMK2N1             | 0.612474    | YWHAB              | -0.64605    |                             |            |           |
| CELSR3              | 0.955295    |                    |             |                             |            |           |
| CHIC2               | 0.796941    |                    |             |                             |            |           |
| CIC                 | 0.552443    |                    |             |                             |            |           |
| DACT3               | 1.123064    |                    |             |                             |            |           |
| DNPEP               | 0.507162    |                    |             |                             |            |           |
| ESPL1               | 0.892412    |                    |             |                             |            |           |
| ETFDH               | 0.63956     |                    |             |                             |            |           |
| EVI5L               | 0.702996    |                    |             |                             |            |           |
| FAM53C              | 0.767975    |                    |             |                             |            |           |
| FLOT2               | 0.910955    |                    |             |                             |            |           |
| FOXO4               | 0.849295    |                    |             |                             |            |           |
| HNRPR               | 0.480605    |                    |             |                             |            |           |
| HOXA9               | 0.589548    |                    |             |                             |            |           |
| IFT20               | 0.435192    |                    |             |                             |            |           |
| LGALS1              | 1.258598    |                    |             |                             |            |           |
| MBD6                | 0.877138    |                    |             |                             |            |           |
| MDH2                | 0.709728    |                    |             |                             |            |           |
| MGST3               | 0.978228    |                    |             |                             |            |           |
| MLL5                | 0.847924    |                    |             |                             |            |           |
| MYH10               | 0.590052    |                    |             |                             |            |           |
| NDUFS4              | 0.465082    |                    |             |                             |            |           |
| NR2F2               | 0.470414    |                    |             |                             |            |           |
| OSR1                | 1.128449    |                    |             |                             |            |           |
| PHC1                | -0.49413    |                    |             |                             |            |           |
| PPP4C               | 0.554091    |                    |             |                             |            |           |
| PSEEN               | 0.619038    |                    |             |                             |            |           |
| PYGL                | 0.892884    |                    |             |                             |            |           |
| RAB12               | 0.541072    |                    |             |                             |            |           |
| RN7SL1              | 0.453105    |                    |             |                             |            |           |
| RNU4-1              | -0.56835    |                    |             |                             |            |           |
| RPRC1               | 0.424729    |                    |             |                             |            |           |
| RSBN1               | 0.861488    |                    |             |                             |            |           |
| RSPRY1              | 0.48187     |                    |             |                             |            |           |

|          |          |
|----------|----------|
| SEC11C   | -0.45032 |
| SFRS5    | 0.469174 |
| SLC25A40 | 1.069229 |
| SSBP2    | 0.624226 |
| TAF15    | 0.573244 |
| THRA     | 0.833    |
| TOB1     | 0.55799  |
| TP53BP1  | 0.603477 |
| TUBB2B   | 0.742257 |
| VPS37D   | 1.249846 |
| XRCC1    | 0.951829 |



**Table S10. Genes differentially expressed in MCF-7/CIS cells treated with 1a and 1b antioxidant compounds (1.5 fold cut-off).**

| <u>Cis 1e ONLY</u> |             | <u>Cis 106 ONLY</u> |             | <u>Common in 106 and 1E</u> |            |           |
|--------------------|-------------|---------------------|-------------|-----------------------------|------------|-----------|
| <i>SYMBOL</i>      | <i>Fold</i> | <i>SYMBOL</i>       | <i>Fold</i> |                             | <b>106</b> | <b>1e</b> |
| ANXA2P2            | 1.596063    | ACTR1A              | 0.974304    | GMPS                        | -1.3152    | -1.13499  |
| ATP1A1             | -1.03032    | AMD1                | -0.99254    | NUP153                      | -1.3696    | -1.52659  |
| BAT2D1             | -1.12143    | CALM3               | 1.075784    | PPA1                        | -1.59763   | -1.20682  |
| BZW2               | -1.0406     | CELSR3              | 1.230935    |                             |            |           |
| CHD4               | -1.38716    | CXorf56             | -1.08643    |                             |            |           |
| CHIC2              | 1.049065    | CYCSP52             | -1.2547     |                             |            |           |
| CHPF2              | -1.03047    | FLOT2               | 1.604271    |                             |            |           |
| COPB1              | -1.13418    | FST                 | -1.3886     |                             |            |           |
| CRYAB              | 1.274261    | GTF2A2              | -1.11167    |                             |            |           |
| DNAJA1             | -1.08602    | HINT1               | -1.2263     |                             |            |           |
| DNPEP              | -1.28634    | HNRPR               | -1.10885    |                             |            |           |
| E2F3               | -0.98534    | LOC728937           | -0.98004    |                             |            |           |
| ENO3               | -1.21868    | MED25               | 1.016188    |                             |            |           |
| EXT1               | -1.18031    | MIR21               | 1.088675    |                             |            |           |
| FAM120A            | -1.03076    | PSENN               | 1.248256    |                             |            |           |
| GGNBP2             | -0.9523     | PSMC4               | -1.16609    |                             |            |           |
| H3F3A              | -1.34728    | RPS4X               | -2.05271    |                             |            |           |
| KARS               | -1.11506    | RSBN1               | 1.047825    |                             |            |           |
| KIAA0196           | -1.00456    | SDHB                | 1.212738    |                             |            |           |
| KIAA0261           | -1.49738    | SMS                 | -1.04767    |                             |            |           |
| LASP1              | -0.98613    | SNORD62B            | 1.307799    |                             |            |           |
| LOC100008588       | 1.382722    | TRAPPC3             | 1.172093    |                             |            |           |
| MDH1               | -1.02147    | TRIP6               | 1.016845    |                             |            |           |
| MT1A               | 2.302722    | UBQLN2              | -1.19023    |                             |            |           |
| MTHFD1             | -1.12307    | VPS37D              | 1.288699    |                             |            |           |
| NAG18              | 1.281688    |                     |             |                             |            |           |
| NFIX               | -1.14973    |                     |             |                             |            |           |
| PDGFA              | -1.07687    |                     |             |                             |            |           |
| PSMD1              | -1.00757    |                     |             |                             |            |           |
| PURB               | -1.53049    |                     |             |                             |            |           |
| RN7SK              | 6.093691    |                     |             |                             |            |           |
| RN7SL1             | 1.69044     |                     |             |                             |            |           |
| RNU11              | 1.972105    |                     |             |                             |            |           |
| RNU1-3             | 2.933885    |                     |             |                             |            |           |
| RNU1-5             | 2.883961    |                     |             |                             |            |           |
| RNU1A3             | 2.702857    |                     |             |                             |            |           |
| RNU1F1             | 2.675404    |                     |             |                             |            |           |
| RNU1G2             | 2.951732    |                     |             |                             |            |           |
| RNU5A              | 1.542016    |                     |             |                             |            |           |
| RNU6-1             | 1.379539    |                     |             |                             |            |           |

|         |          |
|---------|----------|
| RNU6-15 | 1.343619 |
| RSPRY1  | -0.95813 |
| SERTAD2 | -1.40228 |
| SFRS2   | -1.20178 |
| SLMAP   | -1.43483 |
| SNX27   | -0.98026 |
| SRF     | -1.36313 |
| TNPO3   | -1.26176 |
| TRIP4   | -0.97146 |
| TUBA1A  | -1.76773 |
| TUBA3E  | -1.38303 |
| TUBB4Q  | -1.31534 |
| UBAP2L  | -1.0714  |
| UBR4    | -0.9959  |
| WDR57   | -1.03687 |
| ZNF207  | -1.0055  |
| ZNF674  | 1.216681 |
